# Supplementary material
Source: PubMed Central journal article supplement (PMC3566649)
Supplement: NIHMS363551-supplement-2.pdf [file NIHMS363551-supplement-2.pdf]

## Supplementary figure 1

### Legend

#### **ROS production by neutrophils from blood and spleen from *Ncf1*<sup>\*/\*</sup> MN +/- mice**

(A and D) Blood and spleen cells were stained for surface markers CD11b (Mac-1, M1/70) and Ly6G (1A8) and CD11c gated accordingly. CD11b<sup>+</sup> Ly6G<sup>-</sup> cells are considered as monocytes in blood and CD11b<sup>+</sup> Ly6G<sup>-</sup> CD11c<sup>-</sup> in spleen and CD11b<sup>+</sup> Ly6G<sup>+</sup> cells as neutrophils in both organs. (B and E) Intracellular NCF1 expression was measured in both cell populations. Mean and SEM of 5 animals per group is shown. (C and F) ROS production was assessed by flow cytometry with the dye DHR123 on cells stimulated with PMA for 20 min. Mean and SEM of 5-8 mice per group is shown.
