# Supplementary material
Source: PubMed Central journal article supplement (PMC3566649)

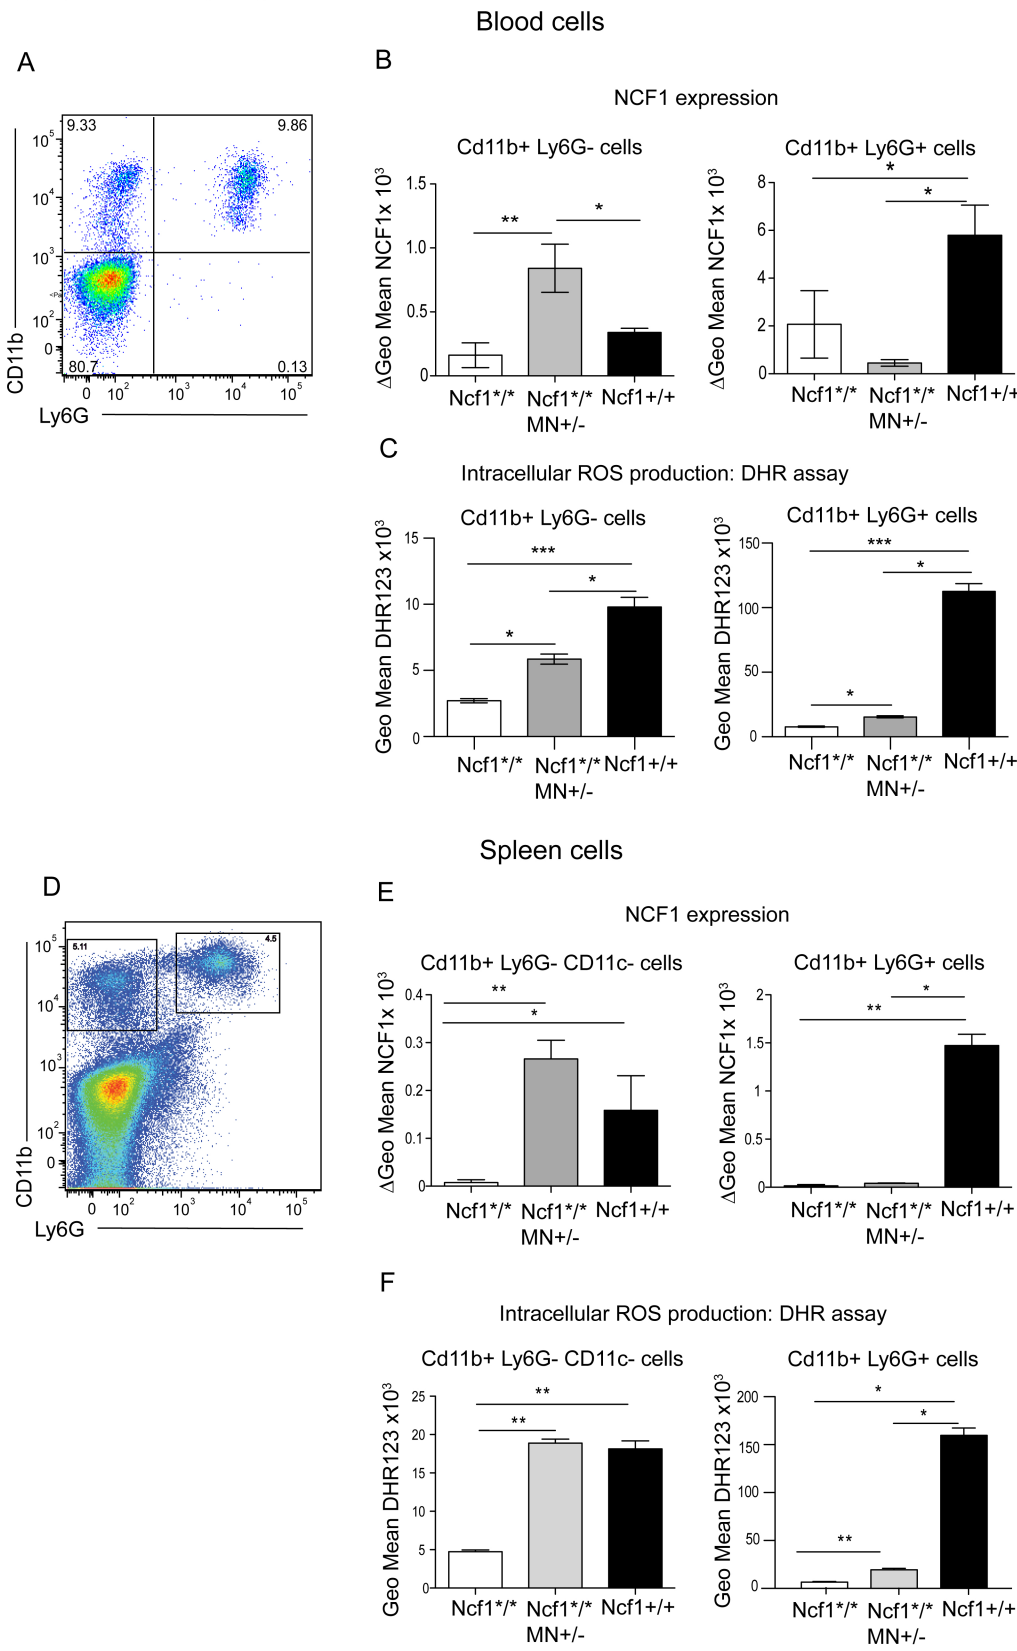

Supplement: NIHMS363551-supplement-1.pdf [file NIHMS363551-supplement-1.pdf]
